# Supplementary material for: Global Regulator AdpA_1075 Regulates Morphological Differentiation and Ansamitocin Production in Actinosynnema pretiosum subsp. auranticum
Source: MDPI journal article supplement (doi:10.3390/bioengineering9110719), 2022-11-21
Supplement: s1 [file s1]

Supplementary materials

# **Global Regulator AdpA\_1075 Regulates Morphological Differentiation and Ansamitocin Production in *Actinosynnema pretiosum* subsp. *auranticum***

**Siyu Guo <sup>1</sup>, Tingting Leng <sup>1</sup>, Xueyuan Sun <sup>1</sup>, Jiawei Zheng <sup>1</sup>, Ruihua Li <sup>1</sup>, Jun Chen <sup>1</sup>, Fengxian Hu <sup>1</sup>, Feng Liu <sup>1,\*</sup> and Qiang Hua <sup>1,2,\*</sup>**

<sup>1</sup> State Key Laboratory of Bioreactor Engineering, East China University of Science and Technology, 130 Meilong Road, Shanghai 200237, China

<sup>2</sup> Shanghai Collaborative Innovation Center for Biomanufacturing Technology, 130 Meilong Road, Shanghai 200237, China

\* Correspondence: fengliu@ecust.edu.cn (F.L.); qhua@ecust.edu.cn (Q.H.); Tel./Fax: +86-21-64250972 (Q.H.)

**Table S1.** Strains and plasmids used in this study.

| Strains                        | Relevant properties                                                                                                                                  | Source or reference |
|--------------------------------|------------------------------------------------------------------------------------------------------------------------------------------------------|---------------------|
| <i>A. pretiosum</i> subsp.     |                                                                                                                                                      |                     |
| <i>auranticum</i>              |                                                                                                                                                      |                     |
| L40                            | ARTP mutant derived from ATCC 31565                                                                                                                  | [1]                 |
| MD01                           | L40 with <i>asm25</i> deletion                                                                                                                       | [2]                 |
| MD02                           | L40 with T1PKS-15 deletion                                                                                                                           | [2]                 |
| MD07                           | L40 with <i>ssgA_6663</i> deletion                                                                                                                   | This work           |
| MD08                           | L40 with <i>adpA_1075</i> deletion                                                                                                                   | This work           |
| MD09                           | L40 with <i>asm28</i> deletion                                                                                                                       | This work           |
| MD15                           | MD02 with T1PKS/NRPS-5 deletion                                                                                                                      | [2]                 |
| MD19                           | MD01 with <i>asm28</i> deletion                                                                                                                      | This work           |
| OEssgA                         | L40 <i>attB</i> $\Phi$ C31:: pSETKssgA                                                                                                               | This work           |
| OEftsZ::ssgA                   | L40 <i>attB</i> $\Phi$ C31:: pSETKftsZ::ssgA                                                                                                         | This work           |
| MD02::pSETK                    | MD02 <i>attB</i> $\Phi$ C31:: pSETK                                                                                                                  | This work           |
| MD02::ssgA                     | MD02 <i>attB</i> $\Phi$ C31:: pSETKssgA                                                                                                              | This work           |
| MD02::adpA                     | MD02 <i>attB</i> $\Phi$ C31:: pSETKadpA                                                                                                              | This work           |
| MD02::ftsZ                     | MD02 <i>attB</i> $\Phi$ C31:: pSETKftsZ                                                                                                              | This work           |
| MD01:: asm28                   | MD01 <i>attB</i> $\Phi$ C31:: pSETKasm28                                                                                                             | This work           |
| <i>E. coli</i>                 |                                                                                                                                                      |                     |
| DH10B                          | Cloning host                                                                                                                                         | Invitrogen          |
| ET12567/pUZ8002                | For intergeneric conjugation                                                                                                                         | [3]                 |
| BL21 (DE3)                     | Host for expression of protein                                                                                                                       | Invitrogen          |
| BL21 (DE3)/pET-28a-adpA_1075   | Host for expression of AdpA_1075                                                                                                                     | This work           |
| <b>Plasmids</b>                |                                                                                                                                                      |                     |
| pCRISPR-Cas9apre               | pCRISPR-Cas9 derivative, <i>rep(pIJ101)</i> , codon-optimized cas9 towards <i>A. pretiosum</i> , <i>Xma</i> II- <i>Sna</i> BI sgRNA cloning cassette | [2]                 |
| pCRISPR-Cas9apre $\Delta$ ssgA | pCRISPR-Cas9apre derivative, for <i>ssgA_6663</i> deletion                                                                                           | This work           |
| pCRISPR-Cas9apre $\Delta$ adpA | pCRISPR-Cas9apre derivative, for <i>adpA_1075</i> deletion                                                                                           | This work           |

|                                        |                                                                                                    |            |
|----------------------------------------|----------------------------------------------------------------------------------------------------|------------|
| pCRISPR-Cas9apre $\Delta$ <i>asm28</i> | pCRISPR-Cas9apre derivative, for <i>asm28</i> deletion                                             | This work  |
| pSET152                                | Integrative vector based on $\Phi$ C31 integrase                                                   | [4]        |
| pSETK                                  | pSET152 derivative with <i>kasOp</i> *                                                             | This work  |
| pSETK <sub>ssgA</sub>                  | pSETK derivative for <i>kasOp</i> * controlled <i>ssgA</i> _6663 overexpression                    | This work  |
| pSETK <sub>ftsZ</sub>                  | pSETK derivative for <i>kasOp</i> * controlled <i>ftsZ</i> _5883 overexpression                    | This work  |
| pSETK <sub>ftsZ:ssgA</sub>             | pSETK derivative for <i>kasOp</i> * controlled <i>ftsZ</i> _5883: <i>ssgA</i> _6663 overexpression | This work  |
| pSETK <sub>adpA</sub>                  | pSETK derivative for <i>kasOp</i> * controlled <i>adpA</i> _1075 overexpression                    | This work  |
| pSETK <sub>asm28</sub>                 | pSETK derivative for <i>kasOp</i> * controlled <i>asm28</i> overexpression                         | This work  |
| pET-28a(+)                             | <i>E. coli</i> expression vector                                                                   | Invitrogen |
| pET-28a- <i>adpA</i> _1075             | pET-28a derivative carrying <i>adpA</i> _1075                                                      | This work  |

**Table S2.** Primers used in this study.

| Primers                                                                    | Sequences (from 5' to 3') <sup>a, b</sup>                                                         |
|----------------------------------------------------------------------------|---------------------------------------------------------------------------------------------------|
| <b>Primers for the construction and identification of deletion mutants</b> |                                                                                                   |
| ssgA-UHA-f                                                                 | CGGGATCTCGTCGAAGGCACTAGAAATGAATATTAAATTGTGCTAAGACT<br>T                                           |
| ssgA-UHA-r                                                                 | CGGCAGGATTCGAACCTGCGACACCCGCTTTAGGAGAGCGGTGTCAGGT<br>GTCTAGCCTTCCCGTCTTGGT                        |
| ssgA-DHA-f                                                                 | TAAAGCGGGTGTGCGAGGTTCGAATCCTGCCGGGGGCACAAGTAGCCG<br>CTCCCCTCAACCCCCAGGACG                         |
| ssgA-DHA-r                                                                 | GACCCGCGCGGTTCGATCCCCGCATATTCCTCACCGTCCCGCTGTGGCTCA                                               |
| adpA-UHA-f                                                                 | ATCTCGTCGAAGGCACTAGATTGCGATTCCGTACGCGCGG                                                          |
| adpA-UHA-r                                                                 | CGAATCGGGCAACTAGTTTATGGCATGGCCGGATGTTTGCACATG                                                     |
| adpA-DHA-f                                                                 | CGGCCATGCCATAAACTAGTTGCCCGATTTCGGTTTGCTTTCACCCG                                                   |
| adpA-DHA-r                                                                 | CCCGCGCGGTTCGATCCCCGCATATTCGTTGATCTTGGTGGTGGTGCC                                                  |
| asm28-UHA-f                                                                | TGCGGGATCTCGTCGAAGGCACTAGATGCACGGCCTTGCCCCAGC                                                     |
| asm28-UHA-r                                                                | GGGCCGACCGGGCTTCCGGTTCGGCACTAGTTTATCATGCCTGCCTCCAG<br>GGCG                                        |
| asm28-DHA-f                                                                | ACACCTGCGCCCTGGAGGCAGGCATGATAAACTAGTGCCGACCGGAAA<br>GCCCCG                                        |
| asm28-DHA-r                                                                | ACCCGCGCGGTTCGATCCCCGCATATGTCCTCGTCCATGACGCGGCG                                                   |
| ΔssgAcheck-f                                                               | TAGGGCTCGTCGAACAGCGGCTCC                                                                          |
| ΔssgAcheck-r                                                               | CCATGCTGACCGCGCTGAACTTCAT                                                                         |
| ΔadpAcheck-f                                                               | TTCACGACCACTTCCGGCATCGCGG                                                                         |
| ΔadpAcheck-r                                                               | GCTGAGGGTGAGGTTCTCGTCGACGTCGA                                                                     |
| Δasm28check-f                                                              | ATCGTTTACCCCCCTGCCCGCACG                                                                          |
| Δasm28check-r                                                              | GCGATCAACAGCCCGTTCTTCGAGCAC                                                                       |
| <b>Primers for amplification of sgRNA cloning cassette</b>                 |                                                                                                   |
| ssgA_6663-sg-F                                                             | TGGTAGGATCGACGGCCTAGGGGAGCTGCACTACGAGCCCCG<br>GTTTTAGAGCTAGAAATAGC, <i>Xma</i> II site underlined |
| adpA_1075-sg1-F                                                            | TGGTAGGATCGACGGCCTAGGGCAGCAGCAGGACAACGCGG<br>GTTTTAGAGCTAGAAATAGC, <i>Xma</i> II site underlined  |
| adpA_1075-sg2-F                                                            | TGGTAGGATCGACGGCCTAGGGCAGCAGCAGGACAACG<br>GTTTTAGAGCTAGAAATAGC, <i>Xma</i> II site underlined     |
| asm28-sg-F                                                                 | TGGTAGGATCGACGGCCTAGGGGTGCACCTCGCGTTCGGCG<br>GTTTTAGAGCTAGAAATAGC, <i>Xma</i> II site underlined  |

---

|                                                                                       |                                                                                                              |
|---------------------------------------------------------------------------------------|--------------------------------------------------------------------------------------------------------------|
| sgRNA-R                                                                               | TCAGCAGTCCCCGGAACATCGTAGCTGACGCC <u>TACGT</u> AAAAAAGCAC<br>CGACTCGGTGCC, <i>Sna</i> BI site underlined      |
| <b>Primers for the construction and identification of gene overexpression strains</b> |                                                                                                              |
| ssgA-oe-f                                                                             | GGAGTTATCTGAGTTGAAGAGGTGACGTCC <u>CATATG</u> ATGAGCGCCGAGAG<br>CATCACCACGA, <i>Nde</i> I site underlined     |
| ssgA-oe-r                                                                             | GAAACAGCTATGACATGATTACGAATTC <u>GATATC</u> TCAGTTGGTCGAGAC<br>CAGCTTGGC, <i>Eco</i> RV site underlined       |
| adpA-oe-f                                                                             | GGAGTTATCTGAGTTGAAGAGGTGACGTCC <u>CATATG</u> ATGCCACCCCACCG<br>CGTTGTCCTGC, <i>Nde</i> I site underlined     |
| adpA-oe-r                                                                             | GAAACAGCTATGACATGATTACGAATTC <u>GATATC</u> TCACCCGGCGGAGCG<br>GAACGTGGTCCGGTA, <i>Eco</i> RV site underlined |
| ftsZ-oe-f                                                                             | GGAGTTATCTGAGTTGAAGAGGTGACGTCC <u>CATATG</u> ATGACGCCCCCGCA<br>CAACTACCTCG, <i>Nde</i> I site underlined     |
| ftsZ-oe-r                                                                             | GAAACAGCTATGACATGATTACGAATTC <u>GATATC</u> TCAGCGCCGCATGAA<br>CGGCGGCACG, <i>Eco</i> RV site underlined      |
| asm28-oe-f                                                                            | GGAGTTATCTGAGTTGAAGAGGTGACGTCC <u>CATATG</u> ATGACCGACACGAC<br>GACGCGCCAC, <i>Nde</i> I site underlined      |
| asm28-oe-r                                                                            | GAAACAGCTATGACATGATTACGAATTC <u>GATATC</u> TCAGTCGTCGGACCG<br>CGC, <i>Eco</i> RV site underlined             |
| 152yz-F                                                                               | GCGTAAGGAGAAAATACCGCATCAG                                                                                    |
| 152yz-R                                                                               | TTCTGTGGATAACCGTATTACCGCC                                                                                    |
| ftsZchk-f                                                                             | CAAGCTCGACATCGGCCGGGAGCT                                                                                     |
| ssgAchk-r                                                                             | ATGTGCTCCGCGATGGCGGACAGGA                                                                                    |
| <b>Primers for <i>adpA</i>_1075 heterologous expression amplification</b>             |                                                                                                              |
| 28a1075-F                                                                             | CTGGTGCCGCGCGGCAGC <u>CATATG</u> ATGCCACCCCACCGCGTTGTCCTG,<br><i>Nde</i> I site underlined                   |
| 28a1075-R                                                                             | TGGTGCTCGAGTGCGGCCGC <u>AAGCTT</u> TCACCCGGCGGAGCGGAACGT,<br><i>Hind</i> III site underlined                 |
| <b>Primers for EMSA probe with biotin labeling</b>                                    |                                                                                                              |
| 5'Biotin-                                                                             |                                                                                                              |
| Pasm28-f-Biotin                                                                       | CGCAGTGGCCCCGAACGGGTCCGCAGTGGCCCCGAACGGGTCCGCAGTGG<br>CCCCGAACGGGTC                                          |
| Pasm28-r                                                                              | GACCCGTTCCGGGCCACTGCGGACCCGTTCCGGGCCACTGCGGACCCGTTT<br>GGGCCACTGCG                                           |

---

---

|                                         |                                                            |
|-----------------------------------------|------------------------------------------------------------|
|                                         | 5'Biotin-                                                  |
| PssgA-f-Biotin                          | GTGTTGGCCGGAACCACGGTGTGGCCGGAACCACGGTGTGGCCGGA<br>CCACG    |
| PssgA-r                                 | CGTGGTTCCGGCCAACACCGTGGTTCCGGCCAACACCGTGGTTCCGGCC<br>AACAC |
| <b>Primers used in qRT-PCR analysis</b> |                                                            |
| ftsZ_5883-RT-F                          | ATCAAGGTCGTCGGCATCG                                        |
| ftsZ_5883-RT-R                          | TCGGCGTCGGACATCAGC                                         |
| ssgA_6663-RT-F                          | TCGAGGCGGAGCTGCACTACG                                      |
| ssgA_6663-RT-R                          | CTTGGCGAGCTCCCGGTCGAA                                      |
| adpA_1075-RT-F                          | CTGCTCAGCGAGGCGGACA                                        |
| adpA_1075-RT-R                          | GGGGAACAGCAGGCGGAACT                                       |
| ssgB_2072-RT-F                          | TACGCGGTCATCGCCGCGTTC                                      |
| ssgB_2072-RT-R                          | AACCACGACGTCGTACGTCCG                                      |
| csIA_0512-RT-F                          | GCTCCCCGCAGCGACAAC                                         |
| csIA_0512-RT-R                          | AGCCAGGTGCCCCAGGTG                                         |
| asm28-RT-F                              | TACGACGGCCTGGAGT                                           |
| asm28-RT-R                              | TTGAGCGGCACGAAGT                                           |

---

Note: a, The overlap sequence for DNA assembly is filled with gray background. b, The N20 target sequences of sgRNA are shown in bold.

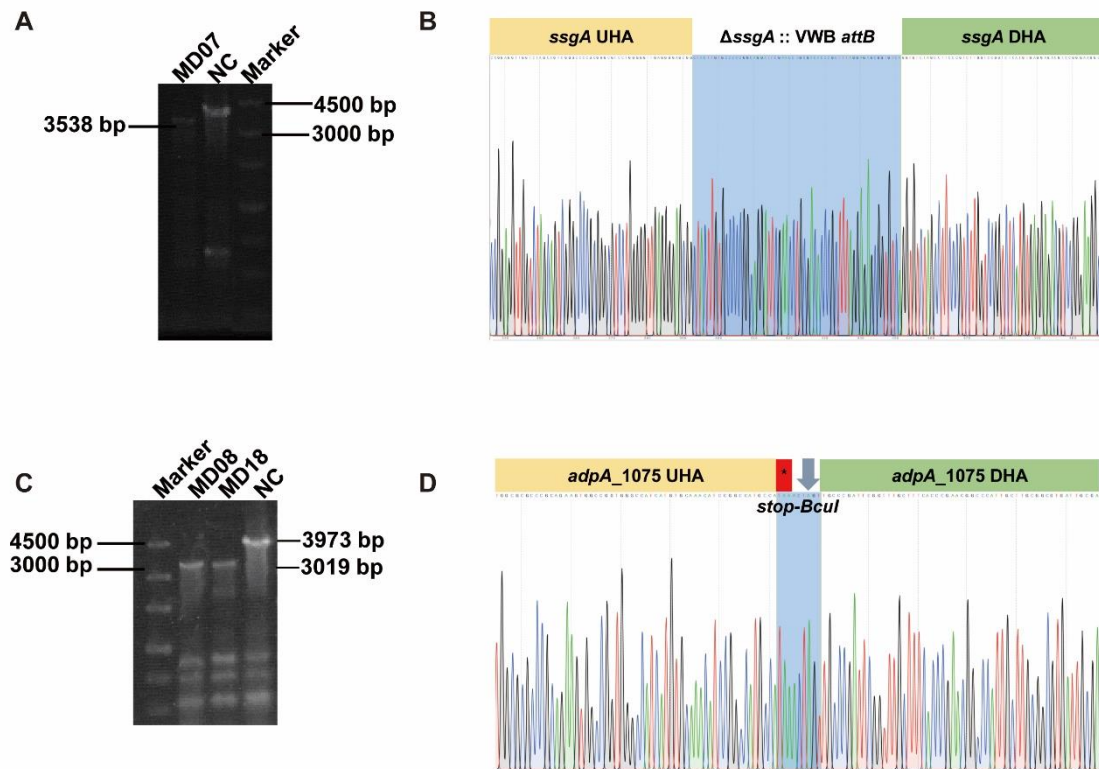

**Figure S1.** Verification of *ssgA*<sub>6663</sub> and *adpA*<sub>1075</sub> gene deletion mutant strains. (A) PCR identification of mutant with *ssgA*<sub>6663</sub> deletion using test primer pairs  $\Delta$ *ssgA*check- f/r. The PCR product of the mutant MD07 was 3538 bp, NC, negative control. (B) Sanger sequencing chromatograms for the MD07 mutant. Upstream homology arm is shown in yellow, downstream homology arm is shown in green. 411 bp *VWB attB* site sequence replaced *ssgA*<sub>6663</sub> gene sequence showing in blue. (C) PCR identification of mutant with *adpA*<sub>1075</sub> deletion using test primer pairs  $\Delta$ *adpA*check-f/r. The PCR products of mutant with *adpA*<sub>1075</sub> deletion was 3019 bp, and those of negative control were 3973 bp. NC, negative control. (D) Sanger sequencing chromatograms for mutant with *adpA*<sub>1075</sub> deletion. Upstream homology arm is shown in yellow, downstream homology arm is shown in green. Stop codon (TAA) and *BcuI* replaced *adpA*<sub>1075</sub> gene sequence showing in blue.

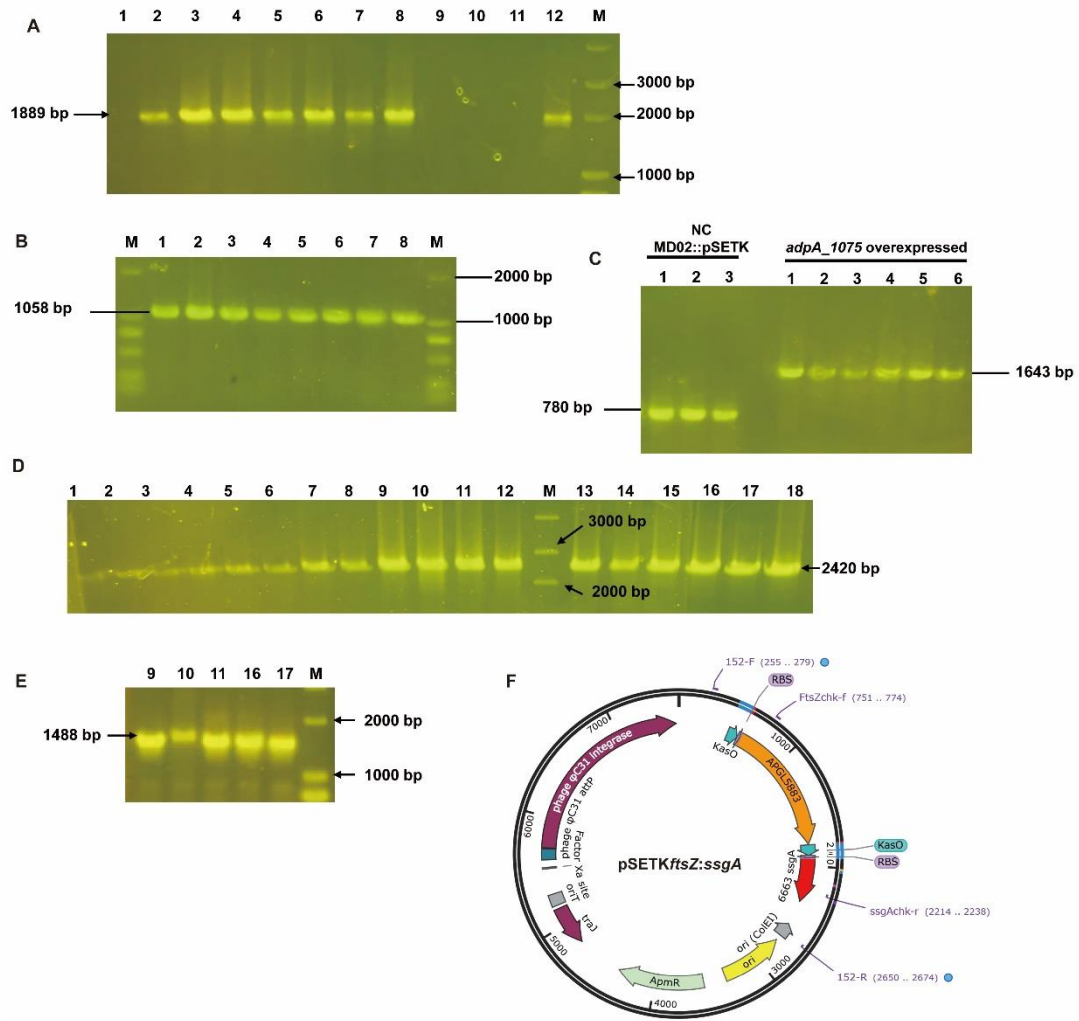

**Figure S2.** Identification of recombinant strains. (A) PCR identification of mutant with *ftsZ\_5883*-overexpressed. (B) PCR identification of mutant with *ssgA\_6663*-overexpressed. (C) PCR identification of mutant with *adpA\_1075*-overexpressed. Strain MD02::pSETK was selected as negative control. (D, E) PCR identification of strain overexpressing *ssgA\_6663* and *ftsZ\_5883* in tandem. Primer pairs 152yz-F/R were used in all verification of recombinant strains by PCR. Tandem overexpression of *ssgA\_6663* and *ftsZ\_5883* was detected by *ftsZchk-f/ssgAchk-r* for double check. (F) Map of pSETKftsZ:ssgA, the expression of the *ftsZ\_5883* and *ssgA\_6663* are driven by the *kasOp\**.



|            |        |         |              |              |                 |          |
|------------|--------|---------|--------------|--------------|-----------------|----------|
|            | 1      | 10      | 20           | 30           | 40              | 50       |
| APASM_1021 | ...V   | VVLVLPD | VVAFDLGVPGQI | GGARDAADRRLY | RVVDVCTPGGAPVRS | ASGFTVTN |
| AdpA_1075  | MPPHRV | VVLVLPD | VVAFDLGVPGQI | GGARDAADRRLY | RVVDVCTPGGAPVRS | ASGFTVTN |

  

|            |         |           |                |       |                |             |
|------------|---------|-----------|----------------|-------|----------------|-------------|
|            | 60      | 70        | 80             | 90    | 100            | 110         |
| APASM_1021 | DRGLDLL | GEADTVVVP | GVHDLRALIDRGEL | PDGVC | ALRAASARGARVMS | ICTGAFALAAA |
| AdpA_1075  | DRGLDLL | GEADTVVVP | GVHDLRALIDRGEL | PDGVC | ALRAASARGARVMS | ICTGAFALAAA |

  

|            |           |            |         |        |       |             |
|------------|-----------|------------|---------|--------|-------|-------------|
|            | 120       | 130        | 140     | 150    | 160   | 170         |
| APASM_1021 | GLLDGRRAT | THNLHAEFRL | LPVELDP | GVLFVD | GDVLT | SAGVAAGIDLC |
| AdpA_1075  | GLLDGRRAT | THNLHAEFRL | LPVELDP | GVLFVD | GDVLT | SAGVAAGIDLC |

  

|            |               |             |         |           |            |           |
|------------|---------------|-------------|---------|-----------|------------|-----------|
|            | 180           | 190         | 200     | 210       | 220        | 230       |
| APASM_1021 | GSEVANRAARRSV | VPSWRPGGQAQ | IFDRPLP | AGDASTAPV | RAWALEHLDE | PLDLRALAG |
| AdpA_1075  | GSEVANRAARRSV | VPSWRPGGQAQ | IFDRPLP | AGDASTAPV | RAWALEHLDE | PLDLRALAG |

  

|            |            |             |          |            |         |                |
|------------|------------|-------------|----------|------------|---------|----------------|
|            | 240        | 250         | 260      | 270        | 280     | 290            |
| APASM_1021 | RARMSVRTFT | TRRFREETGAS | PGEWLLRQ | RVDARRLLET | TDLPVDQ | VARHAGFGTGAALR |
| AdpA_1075  | RARMSVRTFT | TRRFREETGAS | PGEWLLRQ | RVDARRLLET | TDLPVDQ | VARHAGFGTGAALR |

  

|            |             |             |
|------------|-------------|-------------|
|            | 300         | 310         |
| APASM_1021 | QRFAAALGVSP | SGYRTTFRSAG |
| AdpA_1075  | QRFAAALGVSP | SGYRTTFRSAG |

Figure S3. Sequence alignment of AdpA-like protein APASM\_1021 with AdpA\_1075.

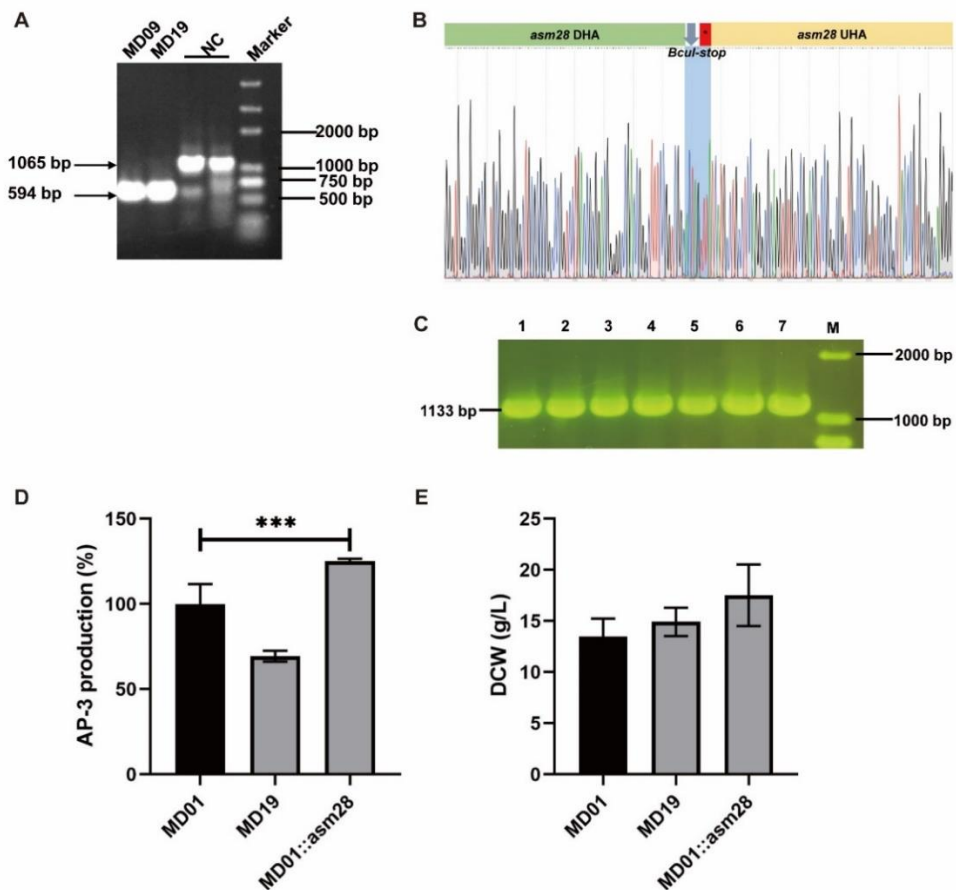

**Figure S4.** Effects of *asm28* gene deletion or overexpression. (A) PCR identification of mutant with *asm28* deletion strain using test primer pairs  $\Delta$ asm28check-f/r. The PCR products of the mutants were 594 bp, and that of negative control was 1065 bp. NC, negative control. (B) Sanger sequencing chromatograms for mutant with *asm28* deletion. Upstream homology arm is shown in yellow, downstream homology arm is shown in green. A stop codon (TAA) and *BcuI* replaced *asm28* gene sequence shown in blue. (C) PCR identification of mutant with *asm28*-overexpressed, the expression of the *asm28* is driven by the *kasOp\**. Primer pairs 152yz-F/R were used in verification of recombinant strains by PCR, the products of the overexpression mutants were 1133 bp. MD19, mutant with *asm28* deletion. MD01 was used as control. Three biological replicates were performed in fermentation experiments. Differences were analyzed by one-way ANOVA, \*\*\*,  $p < 0.001$ .

## References

1. Li, J.; Guo, S.; Hua, Q.; Hu, F. Improved AP-3 production through combined ARTTP mutagenesis, fermentation optimization, and subsequent genome shuffling. *Biotechnol Lett* **2021**, *43*, 1143–1154, doi:10.1007/s10529-020-03034-5.
2. Guo, S.; Sun, X.; Li, R.; Zhang, T.; Hu, F.; Liu, F.; Hua, Q. Two strategies to improve the supply of PKS extender units for ansamitocin P-3 biosynthesis by CRISPR–Cas9. *Bioresour. Bioprocess.* **2022**, *9*, 90, doi:10.1186/s40643-022-00583-7.
3. Paget, M.S.B.; Chamberlin, L.; Atrih, A.; Foster, S.J.; Buttner, M.J. Evidence that the extracytoplasmic function sigma factor  $\sigma^E$  is required for normal cell wall structure in *Streptomyces coelicolor* A3(2). *Journal of Bacteriology* **1999**, *181*, 204–211, doi:10.1128/JB.181.1.204-211.1999.
4. Bierman, M.; Logan, R.; O'Brien, K.; Seno, E.T.; Nagaraja Rao, R.; Schoner, B.E. Plasmid cloning vectors for the conjugal transfer of DNA from *Escherichia coli* to *Streptomyces* spp. *Gene* **1992**, *116*, 43–49, doi:10.1016/0378-1119(92)90627-2.
